# Supplementary material for: Shifting Safeties and Mobilities on the Land in Arctic North America: A Systematic Approach to Identifying the Root Causes of Disaster
Source: MDPI journal article supplement (doi:10.3390/su14127061), 2022-06-09
Supplement: s1 [file s1]

## Supplementary Materials

**Table S1. List of Documents Included in Review**

Peer reviewed journal articles:

Akande, V. O., Hendriks, A. M., Ruiter, R. A. C., & Kremers, S. P. J. (2015). Determinants of dietary behavior and physical activity among Canadian Inuit: A systematic review. *The International Journal of Behavioral Nutrition and Physical Activity*, 12, 84. <https://doi.org/10.1186/s12966-015-0252-y>

Akearok, G. H., Holzman, S., Kunnuk, J., Kuppaq, N., Martos, Z., Healey, C., Makkik, R., Mearns, C., Mike-Qaunaq, A., & Tabish, T. (2019). Identifying and Achieving Consensus on Health-Related Indicators of Climate Change in Nunavut. *Arctic*, 72(3), 289–299. <https://doi.org/10.14430/arctic68719>

Albert, S., Bronen, R., Tooler, N., Leon, J., Yee, D., Ash, J., Boseto, D., & Grinham, A. (2018). Heading for the hills: Climate-driven community relocations in the Solomon Islands and Alaska provide insight for a 1.5 °C future. *Regional Environmental Change*, 18(8), 2261–2272. <https://doi.org/10.1007/s10113-017-1256-8>

Allard, Barrand, Barrette, Begin, Bell, Bernier, Bleau, Chaumont, Dibike, Frigon, Lablanc, Paquin, Sharp, & Way. (2012). Climate variability and change in the Canadian Eastern Subarctic IRIS region (Nunavut and Nunatsiavut). In Allard, M. and Lemay, M. In Brown & Lemay (Eds.), *Nunavik and Nunatsiavut: From science to policy. An Integrated Regional Impact Study (IRIS) of climate change and modernization*. (pp. 57–93). ArcticNet Inc.

Anderson, D., Ford, J. D., & Way, R. G. (2018). The Impacts of Climate and Social Changes on Cloudberry (Bakeapple) Picking: A Case Study from Southeastern Labrador. *Human Ecology*, 46(6), 849–863. <https://doi.org/10.1007/s10745-018-0038-3>

Andrachuk, M., & Smit, B. (2012). Community-based vulnerability assessment of Tuktoyaktuk, NWT, Canada to environmental and socio-economic changes. *Regional Environmental Change*, 12(4), 867–885. <https://doi.org/10.1007/s10113-012-0299-0>

Aporta, C. (2002). Life on the ice: Understanding the codes of a changing environment. *Polar Record*, 38(207), 341–354. Scopus. <https://doi.org/10.1017/S0032247400018039>

Aporta, C. (2009). The trail as home: Inuit and their pan-arctic network of routes. *Human Ecology*, 37(2), 131–146. Scopus. <https://doi.org/10.1007/s10745-009-9213-x>

Aporta, C. (2010). The sea, the land, the coast, and the winds: Understanding Inuit sea ice use in context. In *SIKU: Knowing Our Ice: Documenting Inuit Sea Ice Knowledge and Use* (pp. 163–180). Scopus. [https://doi.org/10.1007/978-90-481-8587-0\\_7](https://doi.org/10.1007/978-90-481-8587-0_7)

Aporta, C. (2011). Shifting perspectives on shifting ice: Documenting and representing Inuit use of the sea ice. *The Canadian Geographer/Le Géographe Canadien*, 55(1), 6–19. <https://doi.org/10.1111/j.1541-0064.2010.00340.x>

Aporta, C., & Higgs, E. (2005). Satellite Culture: Global Positioning Systems, Inuit Wayfinding, and the Need for a New Account of Technology. *Current Anthropology*, 46(5), 729–753. <https://doi.org/10.1086/432651>

Archer, L., Ford, J. D., Pearce, T., Kowal, S., Gough, W. A., & Allurut, M. (2017). Longitudinal assessment of climate vulnerability: A case study from the Canadian Arctic. *Sustainability Science*, 12(1), 15–29. <https://doi.org/10.1007/s11625-016-0401-5>

Armitage, D. (2010). Co-management institutions, knowledge, and learning: Adapting to change in the Arctic. <https://core.ac.uk/reader/59355407>

Baron, M., Fletcher, C., & Riva, M. (2020). Aging, Health and Place from the Perspective of Elders in an Inuit Community. *Journal of Cross-Cultural Gerontology*, 35(2), 133–153. <https://doi.org/10.1007/s10823-020-09398-5>

Beaumier, M. C., Ford, J. D., & Tagalik, S. (2015). The food security of Inuit women in Arviat, Nunavut: The role of socio-economic factors and climate change. *Polar Record*, 51(5), 550–559. <https://doi.org/10.1017/S0032247414000618>

Beaumier, M., & Ford, J. D. (2010). Food Insecurity among Inuit Women Exacerbated by Socio-Economic Stresses and Climate Change. *Can J Public Health*, 101(3), 196–201. <https://doi.org/10.17269/cjph.101.1864>

- Bell, T. (2014). Augmenting Inuit knowledge for safe sea-ice travel – the SmartICE information system. *Oceans'14*. <https://doi.org/DOI:10.1109/OCEANS.2014.7003290>
- Bennett, M. M. (2018). From state-initiated to Indigenous-driven infrastructure: The Inuvialuit and Canada's first highway to the Arctic Ocean. *World Development*, 109, 134–148. <https://doi.org/10.1016/j.worlddev.2018.04.003>
- Berkes, F., & Jolly, D. (2001). Adapting to climate change: Social-ecological resilience in a Canadian western Arctic community. *Conservation Ecology*, 5(2). Scopus.
- Berner, J., Brubaker, M., Revitch, B., Kreummel, E., Tcheripanoff, M., & Bell, J. (2016). Adaptation in Arctic circumpolar communities: Food and water security in a changing climate. *International Journal of Circumpolar Health*, 75. <https://doi.org/10.3402/ijch.v75.33820>
- Blair, B., & Lovcraft, A. L. (2020). Risks without borders: A cultural consensus model of risks to sustainability in rapidly changing social-ecological systems. *Sustainability (Switzerland)*, 12(6). Scopus. <https://doi.org/10.3390/su12062446>
- Blakney, S. L. (2010). *Connections to the land: The politics of health and wellbeing in Arviat Nunavut*. <https://mspace.lib.umanitoba.ca/xmlui/handle/1993/3903>
- Boulanger-Lapointe, N., Gerin-Lajoie, J., Collier, L. S., Desrosiers, S., Spiech, C., Henry, G. H. R., Hermanutz, L., Levesque, E., & Cuerrier, A. (2019). Berry Plants and Berry Picking in Inuit Nunangat: Traditions in a Changing Socio-Ecological Landscape. *Human Ecology*, 47(1), 81–93. <https://doi.org/10.1007/s10745-018-0044-5>
- Bowman, L. (2011). Sealing the Deal: Environmental and Indigenous Justice and Mining in Nunavut. *Review of European Community & International Environmental Law*, 20(1), 19–28. <https://doi.org/10.1111/j.1467-9388.2011.00699.x>
- Boyd, A. D., Jardine, C. G., & Furgal, C. M. (2010). A SOCIAL AND CULTURAL CAPITAL APPROACH TO UNDERSTANDING TRADITIONAL ACTIVITIES ON THE LAND IN TWO NORTHERN DENE COMMUNITIES - ProQuest. *The Canadian Journal of Native Studies*, 30(2), 267–287.
- Brinkman, T. J., Hansen, W. D., Chapin, F. S., Kofinas, G., BurnSilver, S., & Rupp, T. S. (2016). Arctic communities perceive climate impacts on access as a critical challenge to availability of subsistence resources. *Climatic Change*, 139(3), 413–427. <https://doi.org/10.1007/s10584-016-1819-6>
- Brinkman, T. J., Maracle, K. B., Kelly, J., Vandyke, M., Firmin, A. A., & Springsteen, A. (2014). *Impact of fuel costs on high-latitude subsistence activities*. <https://doi.org/10.5751/ES-06861-190418>
- Brown, D. R. N., Brinkman, T. J., Verbyla, D. L., Brown, C. L., Cold, H. S., & Hollingsworth, T. N. (2018). Changing River Ice Seasonality and Impacts on Interior Alaskan Communities. *Weather, Climate, and Society*, 10(4), 625–640. <https://doi.org/10.1175/WCAS-D-17-0101.1>
- Brubaker, M., Berner, J., Chavan, R., & Warren, J. (2011). Climate change and health effects in Northwest Alaska. *Global Health Action*, 4. <https://doi.org/10.3402/gha.v4i0.8445>
- Buell, M. (2006) 'Resource Extraction Development and Well-being in the North', *A Scan of the Unique Challenges of Development in Inuit Communities: Ajunnginiq Centre. National Aboriginal Health Organization* [Preprint].
- Bunce, A., Ford, J., Harper, S., Edge, V., & IHACC Research Team. (2016). Vulnerability and adaptive capacity of Inuit women to climate change: A case study from Iqaluit, Nunavut. *Natural Hazards*, 83(3), 1419–1441. <https://doi.org/10.1007/s11069-016-2398-6>
- Carothers, C., Brown, C., Moerlein, K., López, J. A., Andersen, D., & Retherford, B. (2014). Measuring perceptions of climate change in northern Alaska: Pairing ethnography with cultural consensus analysis. *Ecology and Society*, 19(4). <https://doi.org/10.5751/ES-06913-190427>
- Carothers, C., Cotton, S., & Moerlein, K. (2013). *Subsistence use and knowledge of salmon in Barrow and Nuiqsut, Alaska*. University of Alaska Coastal Marine Institute.
- Carter, N. A., Dawson, J., Parker, C., Cary, J., Gordon, H., Kochanowicz, Z., & Weber, M. (2018). *Arctic Corridors and Northern Voices: Governing marine transportation in the*

*Canadian Arctic Kapiangaqiyuaq (Paulatuk, Inuvialuit Settlement Region, Northwest Territories community report)*. <https://doi.org/10.20381/RUOR38040>

Carter, N. A., Dawson, J., & Weber, M. (2019). *Arctic Corridors and Northern Voices: Governing marine transportation in the Canadian Arctic (Coral Harbour, Nunavut community report)*. <https://doi.org/10.20381/RUOR38505>

Caulfield, R.A. (2000) *Food security in Arctic Alaska: a preliminary assessment*. GÉTIC, Université Laval.

Chapin, F. S., III, Knapp, C. N., Brinkman, T. J., Bronen, R., & Cochran, P. (2016). Community-empowered adaptation for self-reliance. *Current Opinion in Environmental Sustainability*, 19, 67–75. Scopus. <https://doi.org/10.1016/j.cosust.2015.12.008>

Chiu, A., Goddard, E., & Parlee, B. (2016). Caribou consumption in northern Canadian communities. *Journal of Toxicology and Environmental Health - Part A: Current Issues*, 79(16–17), 762–797. Scopus. <https://doi.org/10.1080/15287394.2016.1174011>

Christie, K. S., Hollmen, T. E., Huntington, H. P., & Lovvorn, J. R. (2018). Structured decision analysis informed by traditional ecological knowledge as a tool to strengthen subsistence systems in a changing Arctic. *Ecology and Society*, 23(4). Scopus. <https://doi.org/10.5751/ES-10596-230442>

Clark, D. G., Ford, J. D., Berrang-Ford, L., Pearce, T., Kowal, S., & Gough, W. A. (2016a). The role of environmental factors in search and rescue incidents in Nunavut, Canada. *Public Health*, 137, 44–49. <https://doi.org/10.1016/j.puhe.2016.06.003>

Clark, D. G., Ford, J. D., Pearce, T., & Berrang-Ford, L. (2016b). Vulnerability to unintentional injuries associated with land-use activities and search and rescue in Nunavut, Canada. *Social Science & Medicine*, 169, 18–26. <https://doi.org/10.1016/j.socscimed.2016.09.026>

Clerc, C., Gagnon, M., Breton-Honeyman, K., Tremblay, M., Bleau, S., Gauthier, Y., Aloupa, S., Kasudluak, A., Furgal, C., Bernier, M., & Barrett, M. (2011). *Climate change and marine infrastructures in Nunavik: Local expert knowledge and community perspective in Quaqta, Umiujaaq and Kuujjuaq*. (No. R1273a; Issue R1273a). INRS, Centre Eau, Terre et Environnement. <http://espace.inrs.ca/id/eprint/541/>

Cold, H., Brinkman, T., Brown, C., Hollingsworth, T., Brown, D., & Heeringa, K. (2020). Assessing vulnerability of subsistence travel to effects of environmental change in Interior Alaska. *Ecology and Society*, 25(1). <https://doi.org/10.5751/ES-11426-250120>

Collings, P. (2011). Economic strategies, community, and food networks in Ulukhaktok, Northwest Territories, Canada. *Arctic*, 64(2), 207–219. Scopus. <https://doi.org/10.14430/arctic4100>

Cuerrier, A., Brunet, N. D., Gérin-Lajoie, J., Downing, A., & Lévesque, E. (2015). The Study of Inuit Knowledge of Climate Change in Nunavik, Quebec: A Mixed Methods Approach. *Human Ecology*, 43(3), 379–394. Scopus. <https://doi.org/10.1007/s10745-015-9750-4>

Cunsolo Willox, A., Harper, S. L., Edge, V. L., Landman, K., Houle, K., & Ford, J. D. (2013). The land enriches the soul: On climatic and environmental change, affect, and emotional health and well-being in Rigolet, Nunatsiavut, Canada. *Emotion, Space and Society*, 6, 14–24. <https://doi.org/10.1016/j.emospa.2011.08.005>

Dammann, D.O. (2017) *Arctic sea ice trafficability-new strategies for a changing icescape*. University of Alaska Fairbanks.

Davies, H. (2007). *Inuit observations of environmental change and effects of change in Anaktalâk Bay, Labrador* [Thesis]. <https://qspace.library.queensu.ca/handle/1974/917>

Dawson, J., Carter, N., van Luijk, N., Parker, C., Weber, M., Cook, A., Grey, K., & Provencher, J. (2020). Infusing inuit and local knowledge into the low impact shipping corridors: An adaptation to increased shipping activity and climate change in Arctic Canada. *Environmental Science and Policy*, 105, 19–36. Scopus. <https://doi.org/10.1016/j.envsci.2019.11.013>

Debortoli, N. S., Sayles, J. S., Clark, D. G., & Ford, J. D. (2018). A systems network approach for climate change vulnerability assessment. *Environmental Research Letters*, 13(10), 104019. <https://doi.org/10.1088/1748-9326/aae24a>

Desjardins, S. P. A., Friesen, T. M., & Jordan, P. D. (2020). Looking back while moving forward: How past responses to climate change can inform future adaptation and mitigation strategies in the Arctic. *Quaternary International*, 549, 239–248. <https://doi.org/10.1016/j.quaint.2020.05.043>

Dinero, S. C. (2013). Indigenous perspectives of climate change and its effects upon subsistence activities in the Arctic: The case of the Nets'ait Gwich'in. *GeoJournal*, 78(1), 117–137. Scopus. <https://doi.org/10.1007/s10708-011-9424-8>

Dodd, W., Scott, P., Howard, C., Scott, C., Rose, C., Cunsolo, A., & Orbinski, J. (2018). Lived experience of a record wildfire season in the Northwest Territories, Canada. *Canadian Journal of Public Health*, 109(3), 327–337. Scopus. <https://doi.org/10.17269/s41997-018-0070-5>

Dombrowski, K. et al. (2013) 'Out on the land: Income, subsistence activities, and food sharing networks in Nain, Labrador', *Journal of Anthropology*, 2013.

Dowsley, M. (2015). Identity and the evolving relationship between Inuit women and the land in the eastern Canadian Arctic. *Polar Record*, 51(5), 536–549. <https://doi.org/10.1017/S0032247414000564>

Dressler, W. H., Berkes, F., & Mathias, J. (2001). Beluga hunters in a mixed economy: Managing the impacts of nature-based tourism in the Canadian western Arctic. *Polar Record*, 37(200), 35–48. <https://doi.org/10.1017/S0032247400026735>

Driscoll, D. L., Mitchell, E., Barker, R., Johnston, J. M., & Renes, S. (2016). Assessing the health effects of climate change in Alaska with community-based surveillance. *Climatic Change*, 137(3), 455–466. <https://doi.org/10.1007/s10584-016-1687-0>

Driscoll, D. L., Sunbury, T., Johnston, J., & Renes, S. (2013). Initial findings from the implementation of a community-based sentinel surveillance system to assess the health effects of climate change in Alaska. *International Journal of Circumpolar Health*, 72(1), 21405. <https://doi.org/10.3402/ijch.v72i0.21405>

Druckenmiller, M. L., Eicken, H., George, J. C., & Brower, L. (2010). Assessing the shorefast ice: Iñupiat whaling trails off Barrow, Alaska. In *SIKU: Knowing our ice* (pp. 203–228). Springer.

Druckenmiller, M. L., Eicken, H., George, J. C. C., & Brower, L. (2013). Trails to the whale: Reflections of change and choice on an Iñupiat icescape at Barrow, Alaska. *Polar Geography*, 36(1–2), 5–29. Scopus. <https://doi.org/10.1080/1088937X.2012.724459>

Druckenmiller, M. L., Eicken, H., Johnson, M. A., Pringle, D. J., & Williams, C. C. (2009). Toward an integrated coastal sea-ice observatory: System components and a case study at Barrow, Alaska. *Cold Regions Science and Technology*, 56(2), 61–72. <https://doi.org/10.1016/j.coldregions.2008.12.003>

Durkalec, A. (2012). Investigating land-based injury and trauma in the Canadian North. In *Understanding the role of environment for Indigenous health: A case study of sea ice as a place of health and risk in the Inuit community of Nain, Nunatsiavut*.

Durkalec, A., Furgal, C., Skinner, M. W., & Sheldon, T. (2015a). Climate change influences on environment as a determinant of Indigenous health: Relationships to place, sea ice, and health in an Inuit community. *Social Science and Medicine*, 136–137, 17–26. Scopus. <https://doi.org/10.1016/j.socscimed.2015.04.026>

Durkalec, A., Furgal, C., Skinner, M. W., & Sheldon, T. (2015b). Climate change influences on environment as a determinant of Indigenous health: Relationships to place, sea ice, and health in an Inuit community. *Social Science & Medicine*, 136–137, 17–26. <https://doi.org/10.1016/j.socscimed.2015.04.026>

Eerkes-Medrano, L., Atkinson, D. E., Eicken, H., Nayokpuk, B., Sookiayak, H., Ungott, E., & Weyapuk, W. (2017). Slush-Ice Berm Formation on the West Coast of Alaska. *Arctic*, 70(2), 190–202. JSTOR.

Eicken, H., Kaufman, M., Krupnik, I., Pulsifer, P., Apangalook, L., Apangalook, P., Weyapuk Jr., W., & Leavitt, J. (2014). A framework and database for community sea ice observations in a changing Arctic: An Alaskan prototype for multiple users. *Polar Geography*, 37(1), 5–27. Scopus. <https://doi.org/10.1080/1088937X.2013.873090>

- Eisner, W. R., Hinkel, K. M., Cuomo, C. J., & Beck, R. A. (2013). Environmental, cultural, and social change in Arctic Alaska as observed by Iñupiat elders over their lifetimes: A GIS synthesis. *Polar Geography*, 36(3), 221–231. <https://doi.org/10.1080/1088937X.2012.724463>
- Farquhar, S. D. (2020). Inuit Seal Hunting in Canada: Emerging Narratives in an Old Controversy. *ARCTIC*, 73(1), 13–19. <https://doi.org/10.14430/arctic69833>
- Fawcett, D., Pearce, T., Notaina, R., Ford, J. D., & Collings, P. (2018). Inuit adaptability to changing environmental conditions over an 11-year period in Ulukhaktok, Northwest Territories. *Polar Record*, 54(2), 119–132. <https://doi.org/10.1017/S003224741800027X>
- Fidel, M., Kliskey, A., Alessa, L., & Sutton, O. (Olia) P. (2014). Walrus harvest locations reflect adaptation: A contribution from a community-based observation network in the Bering Sea. *Polar Geography*, 37(1), 48–68. <https://doi.org/10.1080/1088937X.2013.879613>
- Ford, J. D. (2009). Vulnerability of Inuit food systems to food insecurity as a consequence of climate change: A case study from Igloolik, Nunavut. *Regional Environmental Change*, 9(2), 83–100. <https://doi.org/10.1007/s10113-008-0060-x>
- Ford, J. D., Clark, D., Pearce, T., Berrang-Ford, L., Copland, L., Dawson, J., New, M., & Harper, S. L. (2019). Changing access to ice, land and water in Arctic communities. *Nature Climate Change*, 9(4), 335. <https://doi.org/10.1038/s41558-019-0435-7>
- Ford, J. D., McDowell, G., Shirley, J., Pitre, M., Siewierski, R., Gough, W., Duerden, F., Pearce, T., Adams, P., & Statham, S. (2013). The Dynamic Multiscale Nature of Climate Change Vulnerability: An Inuit Harvesting Example. *Annals of the Association of American Geographers*, 103(5), 1193–1211. <https://doi.org/10.1080/00045608.2013.776880>
- Ford, J. D., Pearce, T., Gilligan, J., Smit, B., & Oakes, J. (2008a). Climate change and hazards associated with ice use in northern Canada. *Arctic, Antarctic, and Alpine Research*, 40(4), 647–659. Scopus. [https://doi.org/10.1657/1523-0430\(07-040\)\[FORD\]2.0.CO;2](https://doi.org/10.1657/1523-0430(07-040)[FORD]2.0.CO;2)
- Ford, J. D., Smit, B., & Wandel, J. (2006a). Vulnerability to climate change in the Arctic: A case study from Arctic Bay, Canada. *Global Environmental Change*, 16(2), 145–160. <https://doi.org/10.1016/j.gloenvcha.2005.11.007>
- Ford, J. D., Smit, B., Wandel, J., Allurut, M., Shappa, K., Ittusarjuat, H., & Qrunnut, K. (2008b). Climate change in the Arctic: Current and future vulnerability in two Inuit communities in Canada. *Geographical Journal*, 174(1), 45–62. Scopus. <https://doi.org/10.1111/j.1475-4959.2007.00249.x>
- Ford, J. D., Smit, B., Wandel, J., & MacDonald, J. (2006b). Vulnerability to climate change in Igloolik, Nunavut: What we can learn from the past and present. *Polar Record*, 42(2), 127–138. <https://doi.org/10.1017/S0032247406005122>
- Ford, J., Gough, W., Laidler, G., MacDonald, J., Irngaut, C., & Qrunnut, K. (2009). Sea ice, climate change, and community vulnerability in northern Foxe Basin, Canada. *Climate Research*, 38, 137–154. <https://doi.org/10.3354/cr00777>
- Fox, S., Qillaq, E., Angutikjuak, I., Tigullaraq, D. J., Kautuk, R., Huntington, H. P., Liston, G. E., & Elder, K. (2020). Connecting Understandings of Weather and Climate: Steps Towards Co-Production of Knowledge and Collaborative Environmental Management in Inuit Nunangat. *Arctic Science*. <https://doi.org/10.1139/AS-2019-0010>
- George, J. C., Huntington, H. P., Brewster, K., Eicken, H., Norton, D. W., & Glenn, R. (2004). Observations on shorefast ice dynamics in Arctic Alaska and the responses of the Iñupiat hunting community. *Arctic*, 57(4), 363–374. Scopus. <https://doi.org/10.14430/arctic514>
- GLADDEN, J. N. (2001). Arctic Wilderness Policy in the United States and Finland. *Environmental Management*, 27(3), 367–376. <https://doi.org/10.1007/s002670010155>
- Herman-Mercer, N. M., Loehman, R. A., Toohey, R. C., & Paniyak, C. (2020). Climate- and Disturbance-Driven Changes in Subsistence Berries in Coastal Alaska: Indigenous Knowledge to Inform Ecological Inference. *Human Ecology*, 48(1), 85–99. <https://doi.org/10.1007/s10745-020-00138-4>
- Herrmann, T. M., Sandström, P., Granqvist, K., D'Astous, N., Vannar, J., Asselin, H., Saganash, N., Mameamskum, J., Guanish, G., Loon, J.-B., & Cuciurean, R. (2014). Effects of mining on reindeer/caribou populations and indigenous livelihoods: Community-

based monitoring by Sami reindeer herders in Sweden and First Nations in Canada. *Polar Journal*, 4(1), 28–51. Scopus. <https://doi.org/10.1080/2154896X.2014.913917>

Hipwell, W. et al. (2002) 'Aboriginal peoples and mining in Canada: Consultation, participation and prospects for change', *Ottawa: North-South Institute*, 10.

Hobson, D. (2019) *The energy trilemma of Indigenous Peoples in the Canadian arctic: A way forward*.

Hori, Y., Gough, W. A., Tam, B., & Tsuji, L. J. S. (2018). Community vulnerability to changes in the winter road viability and longevity in the western James Bay region of Ontario's Far North. *Regional Environmental Change*, 18(6), 1753–1763. Scopus. <https://doi.org/10.1007/s10113-018-1310-1>

Huntington, H. P. (2019). From trails to models. *Nature Climate Change*, 9(4), 259–260. Scopus. <https://doi.org/10.1038/s41558-019-0439-3>

Huntington, H. P., Daniel, R., Hartsig, A., Harun, K., Heiman, M., Meehan, R., Noongwook, G., Pearson, L., Prior-Parks, M., Robards, M., & Stetson, G. (2015). Vessels, risks, and rules: Planning for safe shipping in Bering Strait. *Marine Policy*, 51, 119–127. Scopus. <https://doi.org/10.1016/j.marpol.2014.07.027>

Huntington, H. P., Noongwook, G., Bond, N. A., Benter, B., Snyder, J. A., & Zhang, J. (2013). The influence of wind and ice on spring walrus hunting success on St. Lawrence Island, Alaska. *Deep-Sea Research Part II: Topical Studies in Oceanography*, 94, 312–322. Scopus. <https://doi.org/10.1016/j.dsr2.2013.03.016>

Huntington, H. P., Quakenbush, L. T., & Nelson, M. (2016). Effects of changing sea ice on marine mammals and subsistence hunters in northern Alaska from traditional knowledge interviews. *Biology Letters*, 12(8). Scopus. <https://doi.org/10.1098/rsbl.2016.0198>

Huntington, H. P., Quakenbush, L. T., & Nelson, M. (2017). Evaluating the effects of climate change on indigenous marine mammal hunting in northern and western Alaska using traditional knowledge. *Frontiers in Marine Science*, 4, 319.

Inuit Circumpolar Council-Alaska, (2014) 'Bering Strait Regional Food Security Workshop: How to Assess Food Security from an Inuit Perspective: Building a Conceptual Framework on How to', *Anchorage, Alaska: Inuit Circumpolar Council* [Preprint].

Johansson, K., & Manseau, M. (2012). Inuit Safety Culture and Its Relevance to Safety Management in Auyuittuq National Park. *Society & Natural Resources*, 25(2), 176–190. <https://doi.org/10.1080/08941920.2010.551533>

Kapsch, M.-L., Eicken, H., & Robards, M. (2010). Sea Ice Distribution and Ice Use by Indigenous Walrus Hunters on St. Lawrence Island, Alaska. In I. Krupnik, C. Aporta, S. Gearheard, G. J. Laidler, & L. Kielsen Holm (Eds.), *SIKU: Knowing Our Ice: Documenting Inuit Sea Ice Knowledge and Use* (pp. 115–144). Springer Netherlands. [https://doi.org/10.1007/978-90-481-8587-0\\_5](https://doi.org/10.1007/978-90-481-8587-0_5)

Keeling, A. and Cater, T. (no date) 'WHEN MINING COMES (BACK) TO TOWN: EXPLORING HISTORICAL AND CONTEMPORARY MINING ENCOUNTERS IN THE KIVALLIQ REGION, NUNAVUT'. Available at: [https://www.academia.edu/11644852/WHEN\\_MINING\\_COMES\\_BACK\\_TO\\_TOWN\\_EXPLORING\\_HISTORICAL\\_AND\\_CONTEMPORARY\\_MINING\\_ENCOUNTERS\\_IN\\_THE\\_KIVALLIQ\\_REGION\\_NUNAVUT](https://www.academia.edu/11644852/WHEN_MINING_COMES_BACK_TO_TOWN_EXPLORING_HISTORICAL_AND_CONTEMPORARY_MINING_ENCOUNTERS_IN_THE_KIVALLIQ_REGION_NUNAVUT) (Accessed: 26 October 2021).

Kelley, K. E., & Ljubicic, G. J. (2012). Policies and practicalities of shipping in arctic waters: Inuit perspectives from Cape Dorset, Nunavut. *Polar Geography*, 35(1), 19–49. Scopus. <https://doi.org/10.1080/1088937X.2012.666768>

Kushwaha, A. (2007) *Monitoring environmental change using Inuit Qaujimaqatuqanjit in Cape Dorset, Nunavut*. Carleton University.

Laidler, G. J., Ford, J. D., Gough, W. A., Ikummaq, T., Gagnon, A. S., Kowal, S., Qrunnut, K., & Irngaut, C. (2009). Travelling and hunting in a changing Arctic: Assessing Inuit vulnerability to sea ice change in Igloolik, Nunavut. *Climatic Change*, 94(3), 363–397. <https://doi.org/10.1007/s10584-008-9512-z>

Laidler, G. J., & Gough, W. A. (2003). Climate Variability and Climatic Change: Potential Implications for Hudson Bay Coastal Communities. *Polar Geography*, 27(1), 38–58. Scopus. <https://doi.org/10.1080/789610221>

Loring, P. A., & Gerlach, S. C. (2015). Searching for Progress on Food Security in the North American North: A Research Synthesis and Meta-analysis of the Peer-Reviewed Literature. *Arctic*, 68(3), 380–392.

Lynch, A. H., Curry, J. A., Brunner, R. D., & Maslanik, J. A. (2004). Toward an Integrated Assessment of the Impacts of Extreme Wind Events on Barrow, Alaska. *Bulletin of the American Meteorological Society*, 85(2), 209–222. <https://doi.org/10.1175/BAMS-85-2-209>

Natcher, D., Shirley, S., Rodon, T., & Southcott, C. (2016). Constraints to wildlife harvesting among aboriginal communities in Alaska and Canada. *Food Security*, 8(6), 1153–1167. Scopus. <https://doi.org/10.1007/s12571-016-0619-1>

Panikkar, B., & Lemmond, B. (2020). Being on Land and Sea in Troubled Times: Climate Change and Food Sovereignty in Nunavut. *Land*, 9(12), 508. <https://doi.org/10.3390/land9120508>

Pearce, T., Ford, J., Willox, A. C., & Smit, B. (2015). Inuit Traditional Ecological Knowledge (TEK) Subsistence Hunting and Adaptation to Climate Change in the Canadian Arctic. *ARCTIC*, 68(2), 233–245. <https://doi.org/10.14430/arctic4475>

Pearce, T., Smit, B., Duerden, F., Ford, J. D., Goose, A., & Kataoyak, F. (2010). Inuit vulnerability and adaptive capacity to climate change in Ulukhaktok, Northwest Territories, Canada. *Polar Record*, 46(2), 157–177. <https://doi.org/10.1017/S0032247409008602>

Pearce, T.D., Smit, B., Duerden, F., Katayoak, F., Inuktalik, R., Goose, A., Ford, J. and Wandel, J., 2007. *Travel Routes, Harvesting and Climate Change in Ulukhahtok, Canada*. Tristan Pearce.

Pearce, T., Wright, H., Notaina, R., Kudlak, A., Smit, B., Ford, J., & Furgal, C. (2011). Transmission of Environmental Knowledge and Land Skills among Inuit Men in Ulukhaktok, Northwest Territories, Canada. *Human Ecology*, 39(3), 271–288. <https://doi.org/10.1007/s10745-011-9403-1>

Pennesi, K., Arokium, J., & McBean, G. (2012). Integrating local and scientific weather knowledge as a strategy for adaptation to climate change in the Arctic. *Mitigation and Adaptation Strategies for Global Change*, 17(8), 897–922. <https://doi.org/10.1007/s11027-011-9351-5>

Petrasek MacDonald, J., Cunsolo Willox, A., Ford, J. D., Shiwak, I., & Wood, M. (2015). Protective factors for mental health and well-being in a changing climate: Perspectives from Inuit youth in Nunatsiavut, Labrador. *Social Science & Medicine*, 141, 133–141. <https://doi.org/10.1016/j.socscimed.2015.07.017>

Prno, J., Bradshaw, B., Wandel, J., Pearce, T., Smit, B., & Tozer, L. (2011). Community vulnerability to climate change in the context of other exposure-sensitivities in Kugluktuk, Nunavut. *Polar Research*, 30(SUPPL.1). Scopus. <https://doi.org/10.3402/polar.v30i0.7363>

Ready, E., & Collings, P. (n.d.). “All the problems in the community are multifaceted and related to each other”: Inuit concerns in an era of climate change. *American Journal of Human Biology*, n/a(n/a), e23516. <https://doi.org/10.1002/ajhb.23516>

Riedlinger, D., & Berkes, F. (2001). Contributions of traditional knowledge to understanding climate change in the Canadian Arctic. *Polar Record*, 37(203), 315–328. <https://doi.org/10.1017/S0032247400017058>

Rodon, T., & Schott, S. (2014). Towards a sustainable future for Nunavik. *Polar Record*, 50(3), 260–276. <https://doi.org/10.1017/S0032247413000132>

Sakakibara, C. (2011). Climate Change and Cultural Survival in the Arctic: People of the Whales and Mukluk Politics. *Weather, Climate, and Society*, 3(2), 76–89. <https://doi.org/10.1175/WCAS-D-10-05007.1>

Tyson, W. and Heinemeyer, K. (2020) ‘Arctic Climate Change Research and Monitoring’, *Arctic*, 8, p. 3.

Young, S. K., Tabish, T. B., Pollock, N. J., & Young, T. K. (2016). Backcountry Travel Emergencies in Arctic Canada: A Pilot Study in Public Health Surveillance. *International Journal of Environmental Research and Public Health*, 13(3). <https://doi.org/10.3390/ijerph13030276>

Reports:





Middleton (2018) 'ACCESSING AND ASSESSING ENVIRONMENTAL INFORMATION: COMMUNITY-IDENTIFIED METRICS AND MODIFIERS THAT MATTER IN A CHANGING CLIMATE', in *ArcticNet 2018 Conference Abstracts*. ArcticNet, ArcticNet.

Naylor (2021) 'Monitoring the vulnerability of a complex adaptive system to climate change: the subsistence foodshed of Ulukhaktok, NT', in *Arctic Change 2020 Conference Abstracts*. Arctic Change 2020, Arctic Science, pp. 3–135. doi:10.1139/as-2021-0001.

Ovitz and Matari (2021) 'Revisiting traditional knowledge holder interviews exploring social-ecological change on Kendall Island in the Inuvialuit Settlement Region of the Northwest Territories, Canada', in *Arctic Change 2020 Conference Abstracts*. Arctic Change 2020, Arctic Science, pp. 3–135. doi:10.1139/as-2021-0001.

Papatsie (2017) 'IDENTIFYING AND IMPLEMENTING ADAPTATION MEASURES FOR RIVER EROSION IN KUGLUK TERRITORIAL PARK, NUNAVUT', in *ArcticNet 2017 Conference Abstracts*. ArcticNet, ArcticNet.

Paquette (2018) 'POTENTIAL IMPACTS OF SEA ICE AND SHIP TRAFFIC CHANGES ON CARIBOU MIGRATORY ROUTES SURROUNDING KING WILLIAM ISLAND, NUNAVUT', in *ArcticNet 2018 Conference Abstracts*. ArcticNet, ArcticNet.

Ramage (2021) 'How is your life affected by permafrost thaw? – Results from a panarctic survey on the impact of permafrost thaw on subsistence activities', in *Arctic Change 2020 Conference Abstracts*. Arctic Change 2020, Arctic Science, pp. 3–135. doi:10.1139/as-2021-0001.

Roy (2018) 'LESSONS LEARNED FROM MAPPING PERMAFROST VULNERABILITY IN NORTHERN COMMUNITIES', in *ArcticNet 2018 Conference Abstracts*. ArcticNet, ArcticNet.

Simonee and Aooloo (2017) 'EQUIPPING NORTHERN COMMUNITIES WITH ACCESSIBLE, UNDERSTANDABLE, REAL-TIME WEATHER AND WAVE INFORMATION', in *ArcticNet 2017 Conference Abstracts*. ArcticNet, ArcticNet.

Van Luijk (2019) 'HEAVY FUEL OIL USE IN CANADIAN ARCTIC SHIPPING FROM 2010 - 2018', in *ArcticNet 2019 Conference Abstracts*. ArcticNet, ArcticNet.

Vogt (2019) 'EFFECTS OF PERMAFROST DEGRADATION ON VEGETATION COMPOSITION AND ITS NUTRITIONAL AND CULTURAL VALUES IN JEAN MARIE RIVER, NORTHWEST TERRITORIES', in *ArcticNet 2019 Conference Abstracts*. ArcticNet, ArcticNet.
